# Analytical Model of COVID-19 for lifting non-pharmaceutical interventions

Garry Jacyna, James R. Thompson\*, Matt Koehler, and David  
M. Slater

*The MITRE Corporation: 7515 Colshire Drive, McLean, VA 22102*

---

## Abstract

In the present work, we outline a set of coarse-grain analytical models that can be used by decision-makers to bound the potential impact of the COVID-19 pandemic on specific communities with known or estimated social contact structure and to assess the effects of various non-pharmaceutical interventions on slowing the progression of disease spread. This work provides a multi-dimensional view of the problem by examining steady-state and dynamic disease spread using a network-based approach. In addition, Bayesian-based estimation procedures are used to provide a realistic assessment of the severity of outbreaks based on estimates of the average and instantaneous basic reproduction number  $R_0$ .

*Keywords:* COVID-19, Epidemiology, Mathematical model, Contact Network, Intervention

---

## 1. Introduction

2 Network structure plays an important role in disease spread.  
3 Most network models assume full mixing where all individuals  
4 are equally likely to become infected. However, most real-  
5 world networks have vertex degree distributions that are highly  
6 nonuniform. In the sections that follow, we derive a mathematical  
7 framework for determining both the steady-state and dynamic  
8 disease spread on complex networks using the concept of  
9 bond percolation. The analysis borrows liberally from the work  
10 of Pastor-Satorras and Vespignani [1] and Newman [2, 3, 4, 5].

11 Percolation theory is easily explained through analogy. Con-  
12 sider an old fashion coffee percolator consisting of two glass  
13 flasks, the lower flask for heating the water and the upper flask

---

\*corresponding author: jrthompson@mitre.org

14 for holding the coffee grounds. As water is heated in the lower  
15 flask, it begins to ascend through the tube connected to the up-  
16 per flask. Initially, the water penetrates only a small portion of  
17 the coffee grounds. Upon further heating, the water penetrates  
18 more of the coffee grounds. At some point, there is an abrupt  
19 transition where all of the grounds are saturated and convec-  
20 tive mixing occurs. Percolation implies the existence of a long  
21 path connecting points separated by a distance on the order  
22 of the network size (in this case, the layer of coffee grounds).  
23 For a pandemic, this long path connects individuals together  
24 into a large cluster. It turns out that percolation is a critical  
25 phenomenon; that is, the onset of percolation occurs rapidly.

26 Most networks of sufficient complexity undergo phase transi-  
27 tions, where small components (outbreaks) suddenly coalesce  
28 into a giant component (pandemic) that extends across the en-  
29 tire network when one or more critical parameters, such as dis-  
30 ease transmissibility are exceeded. Mean-field theory, a branch  
31 of statistical mechanics used to analyze physical systems with  
32 multiple components, can be used to characterize these regions  
33 [6]. The main idea is to replace all interactions on a component  
34 with an average or effective interaction. Insights into the be-  
35 havior of a system can, therefore, be obtained at relatively low  
36 computational cost.

37 The flow chart in Fig. 1 outlines two analytical models suit-  
38 able for describing the steady-state and time-dependent (dy-  
39 namic) properties of disease progression on a social network.  
40 We present a third model that is used for estimating critical  
41 parameters (such as the basic reproduction number  $R_0$ ) from  
42 empirical outbreak case data. The steady-state model uses the  
43 theory of bond percolation to predict the outbreak size distri-  
44 bution prior to a pandemic, the size of the pandemic in terms  
45 of the proportion of affected individuals, and the risk of indi-  
46 vidual infection based on an individual's contact network. We  
47 consider two types of non-pharmaceutical Interventions (NPIs)  
48 – uniform social distancing where a randomly selected portion  
49 of the population is sequestered and directed social distancing  
50 where individuals with the largest number of contacts are se-  
51 questered (which effectively targets super-spreaders). The dy-  
52 namic model uses a degree-based approximation to the Suscepti-  
53 ble, Infectious, or Recovered (SIR) model based on an approach  
54 outlined by Barthélemy and Pastor-Satorras [7]. We generalized  
55 the model to examine the effects of uniform social distancing,  
56 testing, and contact tracing on the proportion of susceptible  
57 individuals, infected individuals, outbreak cases, and the basic

58 reproduction number ( $R_0$ ) as a function of time. In addition,  
 59 assessments of various NPIs, testing, and contact tracing pro-  
 60 cedures can be determined in near real-time for both analytical  
 61 and empirical networks derived from census data.

62 The third model uses the degree-based SIR model and Bayesian  
 63 estimation procedures to determine the average basic reproduc-  
 64 tion number ( $R_0$ ) from tabulated outbreak cases at a state,  
 65 county, and city-wide level. Additionally, we use a particle-  
 66 based filter to determine the instantaneous  $R_0$  over time. To-  
 67 gether, these estimates can be used to predict the proportional  
 68 number of infections and outbreak cases over time. The an-  
 69 alytical models shown in Fig. 1 provide an overview of the  
 70 mathematical framework derived in the present work. In the  
 71 materials and methods section we first outline the steady-state  
 72 disease spread on social contact networks as a function of the  
 73 degree distribution of the community and the transmissibility of  
 74 the disease. We then present the extension of the framework to  
 75 capture the dynamic properties of disease spread and the imple-  
 76 mentation and lifting of NPIs. Next we introduce the Bayesian-  
 77 based estimation procedure for inferring network structure from  
 78 empirical case data. In the results section we present examples  
 79 for three different degree distributions and illustrate the differ-  
 80 ent risk measures that can be derived from the mathematical  
 81 framework. We also show how the Bayesian-based model can  
 82 be used to predict cases and  $R_0$  for New York state using cases  
 83 data collected by Johns Hopkins University [8]. We close with  
 84 a brief discussion of the results and potential application of the  
 framework.

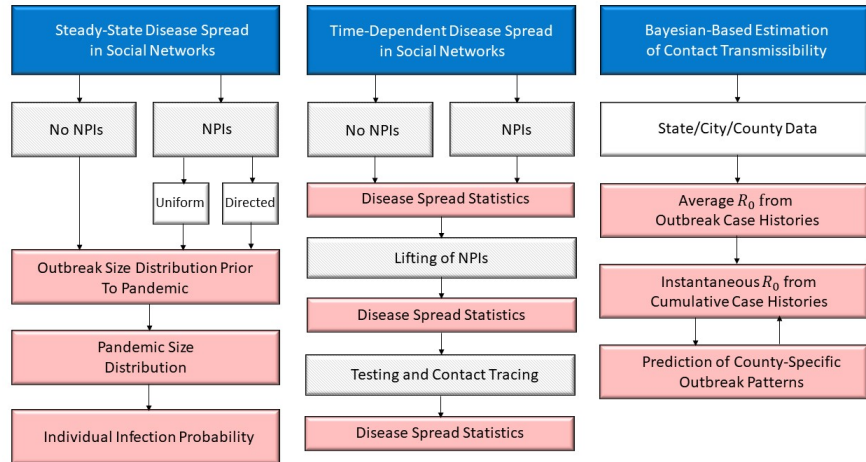

**Figure 1. Process Flow Diagram Detailing the Three Analytical Models Used in this Study**

## 85 2. Materials and methods

86 Throughout this section we use precise definitions of certain  
87 properties of epidemiological models based on Meyers et al.,  
88 Bettencourt et al. and Chowell et al. [9, 10, 11].

- 89 • **Transmissibility**  $T$  is the average probability that an  
90 infectious individual will transmit the disease to a suscep-  
91 tible individual with whom they have contact
- 92 • **Critical Transmissibility**  $T_c$  is the minimum transmis-  
93 sibility required for an outbreak to become a pandemic.  
94  $T_c = \frac{\langle k \rangle}{\langle k^2 \rangle - \langle k \rangle}$  where  $\langle k \rangle$  and  $\langle k^2 \rangle$  are the mean and vari-  
95 ance of the degree distribution of the contact network.
- 96 • **Basic Reproduction Number**  $R_0$  is the expected num-  
97 ber of cases directly generated by one case in the popu-  
98 lation of susceptible individuals. It can be shown to be  
99 equal to the ratio of transmissibility to the critical trans-  
100 missibility  $R_0 = T/T_c$ .
- 101 • **The Instantaneous Reproduction Number**  $R(t) =$   
102  $R_0 s(t)/N(t)$  where  $s(t)$  is the number of susceptible indi-  
103 viduals at time  $t$  and  $N(t)$  is the total population.

104 Note that some studies refer to an effective reproductive number  
105  $R_e$ . In the definitions above,  $R_0$  depends on the degree distri-  
106 bution so there is no need to make this distinction.  $R_0$  and  $R_e$   
107 can be thought of as interchangeable terms.

### 108 2.1. Steady-State Disease Spread in Social Networks

109 Here we outline the procedure for characterizing steady-state  
110 disease spread on complex networks using bond percolation.  
111 The analysis is based on the work of Pastor-Satorras and Vespig-  
112 nani [1] and Newman [2, 3, 4, 5]. Generalizations to the theory  
113 are made to include both uniform and directed social distancing.

114 Given the transmission rate  $r_{i,j}$  between node  $i$  and node  $j$   
115 of a network graph and the infection time  $\tau$ , the transmissibility  
116 is:

$$T = 1 - (1 - r_{i,j} \delta t)^{\tau/\delta t} \rightarrow 1 - e^{-r_{i,j} \tau}, \quad (1)$$

117 as  $\delta t \rightarrow 0$ . Typically,  $r_{i,j} = r$ , where  $r$  and  $\tau$  are independent  
118 random variables. The average transmissibility is then:

$$T = 1 - \iint e^{-r\tau} P_r(r) P_\tau(\tau) dr d\tau, \quad (2)$$

119 where  $P_r(r)$  and  $P_\tau(\tau)$  are the respective probability density  
 120 functions (pdfs). For simplicity, it is assumed that  $P_r(r) =$   
 121  $\delta(r - r_0)$  and  $P_\tau(\tau) = \delta(\tau - \tau_0)$  so that  $T = 1 - e^{-r_0\tau_0}$ .

122 For a randomly chosen vertex, let  $p_k$  denote the probability  
 123 that this vertex has  $k$  edges. Define  $G_0(x)$  as the generating  
 124 function for the degree distribution of this vertex:

$$G_0(x) = \sum_{k=0}^{\infty} p_k x^k. \quad (3)$$

125 This function is similar to the characteristic function; that is,  
 126 given a sum of  $N$  independent and identically-distributed (i. i. d.)  
 127 random variables, the generating function is  $G_0^N(x)$ .

128 Three types of social networks are examined. The Erdős-  
 129 Renyi network has a Poisson degree distribution of the form:

$$p_k = \lambda^k e^{-\lambda} / k!, \quad (4)$$

130 where  $\lambda$  is the mean. The exponential network is used as a  
 131 proxy for an urban network and has a degree distribution of the  
 132 form:

$$p_k = (1 - e^{-\beta}) e^{-\beta k}, \quad (5)$$

133 with parameter  $\beta$ . The power-law (Barabási-Albert) network  
 134 has a majority of small degree links with a small minority of  
 135 large degree links representing super-spreaders and a degree dis-  
 136 tribution of the form:

$$p_k = e^{-k/\kappa} / k^\alpha Li_\alpha(e^{-1/\kappa}), \quad (6)$$

137 where  $\alpha$  and  $\kappa$  are parameters and  $Li_\alpha(x) = \sum_{k=1}^{\infty} x^k / k^\alpha$  is the  
 138 poly-logarithm function.

139 An important result by Feld is that the degree distribution  
 140 of the first neighbor of a vertex is not the same as the degree  
 141 distribution of vertices as a whole [12]. There is a greater chance  
 142 that an edge will be connected to a vertex of high degree, in  
 143 fact, in direct proportion to its degree. Let  $q_k$  denote the degree  
 144 distribution of a vertex at the end of a randomly chosen edge.  
 145 Then:

$$q_{k-1} = kp_k / z, \quad (7)$$

146 excluding the randomly-chosen edge, where  $z = \sum_k kp_k$ . The  
 147 corresponding generating function for this distribution is:

$$G_1(x) = \sum_{k=0}^{\infty} q_k x^k = G_0'(x) / z, \quad (8)$$

148 where  $G'_0(x)$  is the derivative of  $G_0(x)$ .

149 The transmissibility along each edge is taken into account  
150 by interpreting  $T$  in Eq. (2) as a probability ( $0 \leq T \leq 1$ ).  
151 The probability that  $m$  out  $k$  edges is active is binomially dis-  
152 tributed, so:

$$G_0(x; T) = \sum_{k=0}^{\infty} p_k (1 - T + xT)^k = G_0(1 - T + xT), \quad (9)$$

153 where, similarly,  $G_1(x; T) = G_1(1 - T + xT)$ .

### 154 2.1.1. Bond Percolation

155 Most complex networks experience phase transitions where  
156 small components suddenly coalesce into a giant component  
157 that extends across the entire network. The phase transitions of  
158 water as a function of temperature and pressure are examples.  
159 These regions can be described using mean-field theory and the  
160 generating functions  $G_0(x)$  and  $G_1(x)$ . In order to apply mean  
161 field theory, it must be assumed that any finite component of  
162 connected vertices has no closed loops [5]. It can be shown that  
163 the probability of closed loops is on the order of  $\mathcal{O}(1/n)$ , where  
164  $n$  is the network size. As  $n \rightarrow \infty$ , this means that all finite  
165 components have a tree-like (branching) structure.

166 Small outbreaks (percolation clusters) can be characterized  
167 as follows. Let  $H_1(x)$  denote the generating function of the size  
168 distribution of the clusters at the end of the randomly chosen  
169 edge. Referring to the diagram in Fig. 2, the aggregate size of a  
170 cluster is the sum of all the clusters emanating from each vertex.  
171 This is a correct interpretation because there are no closed loops.  
172 For a vertex forming two clusters, the generating function of the  
173 size distribution is  $H_1^2(x)$ , since two i. i. d. clusters are summed  
174 together.

175 Similarly, for a vertex forming  $n$  clusters, the generating  
176 function of the size distribution is  $H_1^n(x)$ . Therefore, in the  
177 limit of large network size:

$$H_1(x) = x \sum_{k=0}^{\infty} q_k H_1^k(x) = xG_1(H_1(x)), \quad (10)$$

178 where  $x$  pre-multiplying the above expression is the originating  
179 vertex and  $G_1(x)$  is as defined in Eq. (8) [3]. Similarly, defin-  
180 ing  $H_0(x)$  as the generating function of the size distribution of  
181 clusters for a randomly chosen vertex, then:

$$H_0(x) = x \sum_{k=0}^{\infty} p_k H_1^k(x) = xG_0(H_1(x)). \quad (11)$$

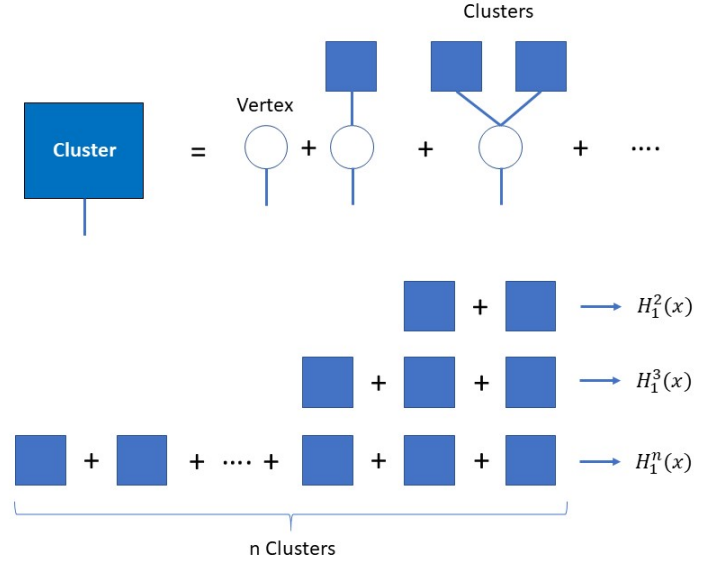

**Figure 2. Computing the size of percolation clusters using mean-field theory**

182 Modifying the above equations to include the transmissibility  
 183  $T$ :

$$\begin{aligned} H_1(x; T) &= xG_1(H_1(x; T); T) \\ H_0(x; T) &= xG_0(H_1(x; T); T). \end{aligned} \quad (12)$$

184 Equation (12) defines the bond percolation process and the anal-  
 185 yses to follow.

### 186 2.1.2. Small Outbreaks

187 The critical transmissibility  $T_c$  leading to a pandemic (giant  
 188 component) can be determined by computing the average size  
 189 of small outbreaks (small components not associated with the  
 190 pandemic). Since  $H_0(x; T) = \sum_k p_k^s x^k$ , where  $p_k^s$  is the cluster  
 191 size probability, the average size of the cluster is  $\langle c \rangle = \sum_k k p_k^s =$   
 192  $H_0'(1; T) = H_0'(1)$ . Newman shows that [2]:

$$\langle c \rangle = H_0'(1) = 1 + TG_0'(1)/(1 - TG_1'(1)); \quad 0 \leq T < T_c, \quad (13)$$

193 where  $G_0(1) = G_1(1) = 1$ . A phase transition occurs when  
 194  $\langle c \rangle \rightarrow \infty$  or, from Eq. (13), when  $T_c = 1/G_1'(1)$  which implies:

$$T_c = \langle k \rangle / (\langle k^2 \rangle - \langle k \rangle). \quad (14)$$

195 The basic reproduction number  $R_0$  can then be defined as  $R_0 =$   
 196  $T/T_c$ , so  $R_0 = 1$  when  $T = T_c$ .

197 In addition to the average outbreak size  $\langle c \rangle$ , the distribu-  
 198 tion of outbreak sizes can also be determined in a computa-  
 199 tionally efficient manner. Recalling that  $H_0(x; T) = \sum_k p_k^s x^k$   
 200 and letting  $x = e^{2\pi j m/M}$ , the outbreak size distribution  $p_k$  is  
 201 equivalent to the inverse discrete Fourier Transform (IDFT) of  
 202  $H_0(e^{2\pi j m/M}; T)$ .

### 203 2.1.3. Pandemic Size

204 The size of the pandemic above the critical threshold  $T_c$  can  
 205 also be determined. However, the giant component spans the  
 206 entire network, so there have to be closed loops. This invalidates  
 207 the tree-like assumption that led to Eq. (12). As Newman points  
 208 out, the problem can be approached indirectly [5]. Recall that  
 209  $H_0(1; T) = \sum_k p_k^s$  is the fraction of components *not* in the gi-  
 210 ant component. This implies that  $P(T) = 1 - H_0(1; T)$  is the  
 211 probability of a pandemic forming. Defining  $v = H_1(1; T)$  and  
 212 using Eq. (12):

$$\begin{aligned} v &= G_1(v; T) \\ P &= 1 - G_0(v; T). \end{aligned} \quad (15)$$

213 This is a fixed point problem. The average outbreak size not as-  
 214 sociated with the pandemic can also be determined. Repeating  
 215 the derivation leading to Eq. (13) and noting that  $H_0(1; T) =$   
 216  $1 - P(T)$ , Newman shows that [3]:

$$\langle c \rangle = 1 + \frac{Tzv^2(T)}{(1 - P(T))(1 - TG'_1(v; T))}; T > T_c. \quad (16)$$

217 The risk of an individual infection is determined by not-  
 218 ing that  $v$  in Eq. (15) is the probability that a node along a  
 219 randomly chosen edge is not infected. For each edge, the prob-  
 220 ability of not getting infected is either  $v$  (contact not infected)  
 221 or  $(1 - T)(1 - v)$  (contact is infected but does not transmit the  
 222 infection). Thus,  $p(T) = v + (1 - T)(1 - v) = 1 - T - vT$ . If  
 223 the individual has  $k$  contacts, then the risk of infection is [2]:

$$\text{Risk}(k; T) = 1 - p^k(T). \quad (17)$$

### 224 2.1.4. Inclusion of NPIs

225 The known methodology outlined above is generalized to in-  
 226 clude social distancing. Specific applications including uniform  
 227 and directed social distancing are then discussed. Let  $b_k$  denote  
 228 the probability that a vertex of degree  $k$  is present. Define the  
 229 generating function  $F_0(x)$  as:

$$F_0(x) = \sum_{k=0}^{\infty} b_k p_k x^k. \quad (18)$$



230 Similarly,  $F_1(x) = F'_0(x)/z$ . This is a generalization of the  
 231 generating functions  $G_0(x)$  and  $G_1(x)$ . Since  $F_0(1) \neq 1$  and  
 232  $F_1(1) \neq 1$ ,  $1 - F_0(1)$  is the probability that a randomly chosen  
 233 vertex has no active edges. From Eq. (12), it follows that [3]:

$$\begin{aligned} H_1(x; T) &= 1 - F_1(1) + xF_1(H_1(x; T); T) \\ H_0(x; T) &= 1 - F_0(1) + xF_0(H_1(x; T); T). \end{aligned} \quad (19)$$

234 The average outbreak size prior to a pandemic with social  
 235 distancing is similar to Eq. (13):

$$\langle c \rangle = 1 + TF'_0(1)/(1 - TF'_1(1)). \quad (20)$$

236 A phase transition leading to a pandemic occurs at the critical  
 237 transmissibility  $T_c = 1/F'_1(1)$ , which follows directly from  
 238 Eq. (20). Similarly, the outbreak size distribution follows directly  
 239 from  $H_0(x; T)$  by defining  $x = e^{2\pi jm/M}$  and using the  
 240 inverse Fourier Transform.

241 The fraction of the population affected by the pandemic  
 242 is similar to Eq. (15). Since  $H_0(1; T) = 1 - P(T)$  and using  
 243 Eq. (19):

$$\begin{aligned} P &= F_0(1) - F_0(v; T) \\ v &= 1 - F_1(1) + F_1(v; T). \end{aligned} \quad (21)$$

244 The average outbreak size not associated with the pandemic is  
 245 analogous to Eq. (16) with  $G_0(x)$  and  $G_1(x)$  replaced by  $F_0(x)$   
 246 and  $F_1(x)$ , respectively. Noting that  $F_0(v; T) = F_0(1) - P$ ,  
 247  $F'_0(v; T) = zF_1(v; T)$ , and  $F_1(v; T) = v - 1 + F_1(1)$ :

$$\langle c \rangle = \frac{F_0(1) - P(T)}{1 - P(T)} + \frac{Tz(v - 1 + F_1(1))^2}{(1 - P(T))(1 - TF'_0(v; T))}. \quad (22)$$

248 The risk of an infection during a pandemic is identical to Eq. (17)  
 249 with  $v$  given by Eq. (21).

### 250 2.1.5. Uniform Social Distancing

251 Let  $b_k = b; 0 \leq b \leq 1$ , so the probability that a vertex of  
 252 degree  $k$  is active is  $b$ . Basically, social distancing is applied  
 253 to every individual regardless of the number of contacts an individual  
 254 may have. For this case,  $F_0(x; T) = bG_0(x; T)$  and  
 255  $F_1(x; T) = bG_1(x; T)$ . The average outbreak size prior to a pandemic  
 256 is identical to Eq. (13) with  $T$  replaced by  $T_{\text{eff}} = bT$ . This  
 257 implies that the critical threshold with uniform social distancing  
 258 is  $T'_c = T_c/b$ . Since the basic reproduction number  $R_0 = T/T_c$ ,

259 the effective reproduction number is  $R'_0 = T/T'_c = bR_0$ . This  
 260 means that the effective reproduction number  $R'_0$  decreases with  
 261 increased uniform social distancing. The outbreak size distri-  
 262 bution similarly follows from Eq. (19).

263 The fraction of the population affected by the pandemic fol-  
 264 lows directly from Eq.(21). Letting  $v' = (v - 1 + b)/b$  and noting  
 265 that  $G_1(v; T) = G_1(1 - bT + bTv')$ :

$$\begin{aligned} P &= b(1 - G_0(v'; T)) = bP(T_{\text{eff}}) \\ v' &= G_1(v'; T_{\text{eff}}), \end{aligned} \quad (23)$$

266 where  $T_{\text{eff}} = bT$ . This is identical to Eq. (15) with no social  
 267 distancing except that the onset of the pandemic is shifted in  
 268 accordance with  $T_{\text{eff}}$  and the affected population is reduced by a  
 269 factor of  $b$ . Outbreaks not associated with the pandemic follow  
 270 from Eq. (22). In particular:

$$\langle c \rangle = \frac{b(1 - P(T_{\text{eff}}))}{1 - bP(T_{\text{eff}})} + \frac{T_{\text{eff}}zbv'^2}{(1 - bP(T_{\text{eff}}))(1 - T_{\text{eff}}G'_0(v'; T_{\text{eff}}))}, \quad (24)$$

271 where  $v' = (v - 1 + b)/b$ . Additionally, the risk of individual  
 272 infection is given by Eq. (17) with  $p = 1 - T_{\text{eff}} + T_{\text{eff}}v'$ .

### 273 2.1.6. Directed Social Distancing

274 Here, it is assumed that:

$$b_k = \begin{cases} 1; & 0 \leq k \leq K_{\text{max}} \\ 0; & k > K_{\text{max}}, \end{cases} \quad (25)$$

275 where all individuals are distanced with contact degree greater  
 276 than  $K_{\text{max}}$ . This implies that:

$$F_0(x) = \sum_{k=0}^{K_{\text{max}}} p_k x^k, \quad (26)$$

277 and  $F_1(x) = F'_0(x)/z$ . For a Poisson network:

$$\begin{aligned} F_0(x) &= e^{-z} \sum_{k=0}^{K_{\text{max}}} (zx)^k / k! \\ F_1(x) &= e^{-z} \sum_{k=0}^{K_{\text{max}}} (zx)^k / k!. \end{aligned} \quad (27)$$

278 For an exponential network:

$$\begin{aligned} F_0(x) &= (1 - e^{-\beta})(1 - (xe^{-\beta})^{K_{\text{max}}+1}) / (1 - xe^{-\beta}) \\ F_1(x) &= (1 - e^{-\beta})^2 (K_{\text{max}}(xe^{-\beta})^{K_{\text{max}}+1} \\ &\quad + 1 - (K_{\text{max}} + 1)(xe^{-\beta})^{K_{\text{max}}}) / (1 - xe^{-\beta})^2. \end{aligned} \quad (28)$$

279 For a power-law network:

$$\begin{aligned} F_0(x) &= Li_\alpha(K_{max}, xe^{-1/\kappa})/Li_\alpha(e^{-1/\kappa}) \\ F_1(x) &= Li_{\alpha-1}(K_{max}, xe^{-1/\kappa})/xLi_{\alpha-1}(e^{-1/\kappa}). \end{aligned} \quad (29)$$

280 The average outbreak size prior to a pandemic is given by  
 281 Eq. (20), where  $F'_0$  and  $F'_1$  can be computed by taking respec-  
 282 tive derivatives of Eqs. (27), (28), and (29). Additionally, the  
 283 fraction of the population affected by the pandemic is given by  
 284 Eq. (21) together with Eqs. (27)-(29). The fractional number  
 285 ( $f_c$ ) of nodes removed due to directed social distancing is related  
 286 to  $K_{max}$  by:

$$f_c = 1 - \sum_{k=0}^{K_{max}} p_k = 1 - F_0(1). \quad (30)$$

287 It is interesting to note that for the power-law network, if a small  
 288 fraction of nodes  $f_c$  is removed, then the critical transmissibil-  
 289 ity  $T'_c \gg T_c$ , indicating a lack of phase transition or pandemic  
 290 onset. This was discussed by Callaway and Newman in another  
 291 context [4]. Both the average outbreak size not associated with  
 292 the pandemic and the individual risk of infection are given by  
 293 Eqs. (22) and (17), respectively.

### 294 2.1.7. Calibration

295 The degree distribution  $p_k$  for each network is calibrated to  
 296 have the same critical transmissibility  $T_c$ . Since  $T_c = 1/G'_1(1)$   
 297 from Eq. (14), it follows that:

$$T_c = \begin{cases} 1/z; & \text{Poisson} \\ (e^\beta - 1)/2; & \text{Exponential} \\ Li_{\alpha-1}(e^{-1/\kappa})/(Li_{\alpha-2}(e^{-1/\kappa}) - Li_{\alpha-1}(e^{-1/\kappa})); & \text{Power-Law.} \end{cases} \quad (31)$$

## 298 2.2. Time-dependent Disease Spread in Social Networks

299 In this section we expand the procedure to characterize time-  
 300 dependent disease spread on complex networks using a stochas-  
 301 tic SIR model. The analysis is based on the work of Barthélemy  
 302 and Pastor-Satorras [7]. Generalizations to the theory are made  
 303 to include social distancing, testing, and contact tracing.

### 304 2.2.1. Introduction

305 A stochastic treatment of the time-dependent properties of  
 306 epidemic models involves determining the probabilities for ver-  
 307 tices to be in specific disease states. This is typically a diffi-  
 308 cult problem because it involves higher-order moments of prob-  
 309 abilities that can only be approximated using moment-closure

310 techniques, where moments are factored into pairwise moment  
 311 products [5]. An alternative approach is degree-based approxi-  
 312 mation pioneered by Pastor-Satorras et al. This approximation  
 313 assumes that all vertices of the same degree have the same prob-  
 314 ability of infection at any given time.

315 Consider the probability that vertex  $A$  becomes infected be-  
 316 tween times  $t$  and  $t + dt$ . To become infected, it must catch the  
 317 disease from one of its neighbors, which requires that the neigh-  
 318 bor be infected. The probability of a neighbor being infected is  
 319  $x_k$ , where  $k$  is the excess degree of the neighbor (recall that the  
 320 excess degree distribution is  $q_k$ ). So, the average probability of  
 321 a neighbor being infected is  $v(t) = \sum_{k=0}^{\infty} q_k x_k$ . The total prob-  
 322 ability of transmission from a single neighbor is  $\beta v(t) dt$ , where  
 323  $\beta$  is the contact rate. The probability of transmission from any  
 324 neighbor is  $\beta k v(t) dt$ , where  $k$  is the number of neighbors associ-  
 325 ated with vertex  $A$ . Thus, the rate of change in the probability  
 326 that a vertex with degree  $k$  is susceptible ( $s_k$ ) is simply:

$$ds_k/dt = -\beta k v(t) s_k. \quad (32)$$

327 Similarly, the probability that a vertex with degree  $k$  is infected  
 328 ( $x_k$ ) is:

$$dx_k/dt = \beta k v(t) s_k - \gamma x_k, \quad (33)$$

329 where  $\gamma = 1/T_r$  is the recovery rate. Finally, the probability  
 330 that a vertex of degree  $k$  has recovered ( $r_k$ ) is:

$$dr_k/dt = \gamma x_k. \quad (34)$$

331 A general solution to Eqs. (32)-(34) is of the form [5]:

$$\begin{aligned} du/dt &= -\beta u v(t) \\ v(t) &= 1 + (\gamma/\beta) \log(u) - s_0 G_1(u), \end{aligned} \quad (35)$$

332 where  $s_0 = s_k(0)$ . Given  $u(0) = 1$ , Eq. (35) can be numerically  
 333 solved for  $u(t)$  and the average probability of infection  $v(t)$  can  
 334 be determined. In addition, the average susceptibility proba-  
 335 bility  $s(t)$  can be computed from the degree distribution of a  
 336 randomly chosen vertex:

$$s(t) = \sum_{k=0}^{\infty} p_k s_k = s_0 G_0(u), \quad (36)$$

337 where  $G_0(x)$  is the moment generating function for  $p_k$ .

338 The function  $u(t)$  in Eq. (35) has a particularly interesting  
 339 interpretation. A fixed point occurs when  $du/dt = 0$  or when

340  $1 + (\gamma/\beta) \log(u) - s_0 G_1(u) = 0$ . If it is assumed that  $u \approx 1$ ,  
 341 then:

$$\begin{aligned} u &= 1 - T + TG_1(u) \\ P &= 1 - G_0(u), \end{aligned} \quad (37)$$

342 where the pandemic size  $P = w(\infty)$  and  $w(t) = \sum_{k=0}^{\infty} q_k r_k$   
 343 is the average recovery probability. Assuming  $\beta/\gamma \ll 1$ , the  
 344 transmissibility is approximately  $T \approx \beta/\gamma$ . If  $u = 1 - T +$   
 345  $Tv$ , then Eq. (15) and Eq. (37) are identical under the above  
 346 assumptions. Therefore, the dynamic SIR model is consistent  
 347 with bond percolation results at steady state.

### 348 2.2.2. Uniform Social Distancing

349 It is assumed that no NPIs are active over a period  $0 \leq$   
 350  $t \leq t_1$ . Over a period  $t_1 < t \leq t_2$ , uniform social distancing  
 351 is implemented where a fraction  $(1 - b)$  of the population is  
 352 sequestered. Over the period  $t_2 < t \leq t_3$ , the NPI is lifted. The  
 353 first period corresponds to the analysis outlined in the previous  
 354 section.

355 For the second period that includes social distancing, the  
 356 stochastic SIR equations for the fraction of the population ( $b$ )  
 357 not sequestered are:

$$\begin{aligned} ds_k/dt &= -\beta k v'(t) s_k \\ dx_k/dt &= \beta k v'(t) s_k - \gamma x_k \\ dr_k/dt &= \gamma x_k, \end{aligned} \quad (38)$$

358 where  $v'(t) = \sum_k q'_k x_k$  and  $q'_k = b q_k$ . Letting  $w'(t) = \sum_k q'_k r_k$ ,  
 359 it follows that  $dw'/dt = \gamma v'(t)$ . Substituting this expression  
 360 into Eq. (38) and simplifying:

$$s_k(t) = s_{k1} u^k(t), \quad (39)$$

361 where  $u(t) = \exp(-\beta(w' - w'_0)/\gamma)$  and  $s_{k1}$  are the fractional  
 362 number of susceptible individuals with  $k$  contacts remaining at  
 363 the end of the first period ( $t = t_1$ ). Since  $x_k = 1 - s_k - r_k$ ,  
 364  $v'(t) = b - b \sum_k q_k s_k - b \sum_k q_k r_k$ . Now,  $s_{k1} = s_0 u_1^k$ , where  
 365  $u_1 = u(t_1)$ , so  $\sum_k q_k s_k = s_0 G_1(u_1 u)$ . Also,  $w'(t) = b \sum_k q_k r_k$ .  
 366 Using the expression for  $u(t)$ ,  $w'(t) = w'_0 - (\gamma/\beta) \log(u)$ , where  
 367  $w'_0 = -b(\gamma/\beta) \log(u_1)$ . Combining results:

$$v'(t) = b - b s_0 G_1(u_1 u) + b(\gamma/\beta) \log(u_1) + (\gamma/\beta) \log(u). \quad (40)$$

368 Finally, since  $dw'/dt = -(\gamma/\beta u) du/dt$  and  $dw'/dt = \gamma v'(t)$ :

$$du/dt = -\beta u v'(t). \quad (41)$$

369 The total average infection probability  $v_T(t)$  needs to include  
 370 the sequestered fraction  $(1 - b)$  of the population. However, the  
 371 average infection probability among the sequestered population  
 372 is  $v_s^0 = (1 - b)v(t_1)$ , where  $v(t_1)$  is determined from Eq. (35). In  
 373 particular:

$$v_s^0 = (1 - b) (1 + (\gamma/\beta) \log(u_0) - s_0 G_1(u_1)), \quad (42)$$

374 where  $u_1 = u(t_1)$ . These infected individuals recover at a rate  
 375  $\gamma$  since, by definition, they are not in contact with each other.  
 376 So:

$$v_T(t) = v'(t) + v_s^0 e^{-\gamma(t-t_1)}; \quad t_1 < t \leq t_2. \quad (43)$$

377 Note that at  $t = t_1$ ,  $v_T(t_1) = v(t_1)$ , so continuity is maintained.  
 378 Finally, the fractional number of susceptibles during the NPI  
 379 period is the sum of the sequestered and non-sequestered frac-  
 380 tion of the population:

$$s(t) = b s_0 G_0(u u_1) + (1 - b) s_0 G_0(u_1). \quad (44)$$

381 For the third period when social distancing is lifted, the  
 382 stochastic SIR equations are identical to Eqs. (32)-(34) except  
 383 that the initial conditions are different. Let  $n_k$  denote the frac-  
 384 tion of the population with  $k$  contacts remaining. However,  
 385  $n_k = b + (1 - b) s_{k1}$ , i.e., the original non-sequestered fraction  
 386 ( $b$ ) and the sequestered fraction ( $(1 - b) s_{k1}$ ), where  $s_{k1} = s_0 u_1^k$ .

387 Let  $v''(t) = \sum_k q_k x_k$  denote the average infection probabili-  
 388 ty, where  $x_k = n_k - s_k - r_k$ . Now,  $s_k$  has the form:

$$s_k = \hat{s}_{k2} u^k, \quad (45)$$

389 where  $\hat{s}_{k2} = b s_{k2} + (1 - b) s_{k1}$ ,  $s_{k2} = s_{k1} u_2^k$ , and  $u_2 = u(t_2)$ . The  
 390 various summations entering into the calculation of  $v''(t)$  are of  
 391 the form:

$$\begin{aligned} \sum_k q_k s_k &= b s_0 G_1(u_1 u_2 u) + (1 - b) s_0 G_1(u_1 u) \\ \sum_k q_k n_k &= b + (1 - b) s_0 G_1(u_1) \\ \sum_k q_k r_k &= w_0 - (\gamma/\beta) \log(u), \end{aligned} \quad (46)$$

392 where  $w_0 = -(\gamma/\beta) \log(u_2) - b(\gamma/\beta) \log(u_1)$ . Combining results:

$$\begin{aligned} v''(t) &= b(1 - s_0 G_1(u_1 u_2 u)) + (1 - b) s_0 (G_1(u_1) - G_1(u_1 u)) \\ &\quad + (\gamma/\beta) \log(u_2 u) + b(\gamma/\beta) \log(u_1). \end{aligned} \quad (47)$$

393 Note that  $v''(t_2) = v'(t_2)$ , as required. The fractional number  
 394 of susceptibles is given by:

$$s(t) = b s_0 G_0(u_1 u_2 u) + (1 - b) s_0 G_0(u_1 u). \quad (48)$$

395 *2.2.3. Testing and Contact Tracing*

396 For periods  $t > t_3$ , a fairly simple model is used to capture  
 397 the relevant details of delayed testing and contact tracing based  
 398 on a generalization of work by Young and Ruschel [13]. The  
 399 modified stochastic SIR model is:

$$\begin{aligned} ds_k/dt &= -\beta k v'''(t) s_k \\ dx_k/dt &= \beta k v'''(t) s_k - \beta k p e^{-\gamma \eta} v'''(t - \eta) s_k(t - \eta) - \gamma x_k \\ dr_k/dt &= \gamma x_k + \beta k p e^{-\gamma \eta} v'''(t - \eta) s_k(t - \eta), \end{aligned} \quad (49)$$

400 where  $\eta$  is the delay in testing after becoming infectious and,  
 401 as before,  $v'''(t) = \sum_k q_k x_k$ . Rather than assuming that infec-  
 402 tious individuals are tested, tracked and sequestered immedi-  
 403 ately with probability  $p$ , there is a delay  $\eta$  in their sequestration.  
 404 Recovered individuals are not added back into the pool of sus-  
 405 ceptible individuals since it is assumed that they have developed  
 406 immunity to the disease.

407 A general solution to Eq. (50) can be determined as follows.  
 408 Integrating the first expression produces  $s_k(t) = \hat{s}_{k3} u^k$ , where:

$$u(t) = \exp\left(-\beta \int_{t_3}^t v'''(s) ds\right), \quad (51)$$

409  $\hat{s}_{k3} = b s_{k3} + (1 - b) s_{k2}$ ,  $s_{k3} = s_{k2} u_3^k$ , and  $u_3 = u(t_3)$ . From  
 410 Eq. (51), it follows that:

$$du/dt = -\beta u v'''(t). \quad (52)$$

411 Averaging the second expression in Eq. (50):

$$dv'''/dt = \beta v'''(t) \sum_k q_k k s_k(t) - \beta p e^{-\gamma \eta} v'''(t - \eta) \sum_k q_k k s_k(t - \eta) - \gamma v'''(t). \quad (53)$$

412 Noting that  $G_1'(x) = \sum_k q_k k x^{k-1}$ :

$$\sum_k q_k k s_k = u(t) \left( b G_1'(u_1 u_2 u_3 u) + (1 - b) G_1'(u_1 u_2 u) \right). \quad (54)$$

413 Therefore, Eq. (53) can be rewritten as:

$$dv'''/dt = -\gamma v'''(t) + \beta s_0 v'''(t) u(t) \zeta(t) - \beta s_0 p e^{-\gamma \eta} v'''(t - \eta) u(t - \eta) \zeta(t - \eta), \quad (55)$$

414 where  $\zeta(t) = b G_1'(u_1 u_2 u_3 u(t)) + (1 - b) G_1'(u_1 u_2 u(t))$ . Equa-  
 415 tions (52) and (55) describe a set of consistent equations for  
 416 numerically computing  $v'''(t)$  and  $s(t)$ , where:

$$s(t) = s_0 b G_0(u_1 u_2 u_3 u(t)) + s_0 (1 - b) G_0(u_1 u_2 u(t)). \quad (56)$$

417 Note that Eq. (55) is initialized by setting  $v'''(t_3) = v''(t_3)$ .

418 *2.3. Bayesian-based Estimation of Contact Transmissibility*

419 We now outline methods for estimating the contact trans-  
 420 missibility from outbreak case data using a stochastic SIR model  
 421 and Bayesian estimation methods. The first approach estimates  
 422 the average transmissibility  $T$  or basic reproduction number  $R_0$   
 423 using either analytical or empirical networks where the degree  
 424 distribution is known or estimated. The second approach esti-  
 425 mates the instantaneous transmissibility  $T(t)$  or basic reproduc-  
 426 tion number  $R_0(t)$  using nonlinear tracking methods based on  
 427 particle-based filtering where explicit network structure is not  
 428 required.

429 *2.3.1. Average Transmissibility*

430 The probability that a vertex of degree  $k$  will experience  
 431 an outbreak is the probability that it gets infected and then  
 432 recovers. From Eq. (33):

$$dc_k/t = dx_k/dt + dr_k/dt = \beta kv(t)s_k. \quad (57)$$

433 The average outbreak case probability  $C(t)$  is determined by  
 434 averaging Eq. (57):

$$dC(t)/dt = \beta v(t)u(t)G'_0(u(t)), \quad (58)$$

435 where  $u(t)$  is given by Eq. (35) and  $\sum_k p_k k s_0 u^k = s_0 u(t)G'_0(u)$ .

436 Define  $\Delta C(t + \xi) = C(t + \xi) - C(t)$  as the fractional change  
 437 in outbreak cases in the interval  $[t, t + \xi]$ . Then, from Eq. (58):

$$\Delta C(t + \xi) \approx \beta \xi s_0 u(t)G'_0(u(t))v(t + \xi). \quad (59)$$

438 Now, returning to Eq. (33), averaging, and integrating the re-  
 439 sults from  $t$  to  $t + \xi$ , assuming that  $\xi \ll 1$ :

$$v(t + \xi) \approx v(t)b_\xi(t; T), \quad (60)$$

440 where  $b_\xi(t; T) = \exp(\gamma \xi (s_0 T u(t)G'_1(u(t)) - 1))$  and  $T = \beta/\gamma$ .

441 Finally, substituting this expression into Eq. (59):

$$\Delta C(t + \xi) = \Delta C(t)b_\xi(t; T). \quad (61)$$

442 This implies a linear relationship between the fractional change  
 443 in outbreak cases between time steps  $\xi$ .

444 The change in the number of outbreak cases  $\Delta N(t)$  is  $\Delta N(t) =$   
 445  $NC(t)$ , where  $N$  is the population size. Assume that  $\Delta N(t)$  is  
 446 integer-valued and let the measurements comprise the collection



447  $\{\Delta N_1, \Delta N_2, \dots, \Delta N_J\}$ , where  $\Delta N_i = \Delta N(t_i)$ . The resulting  
 448 likelihood function can be factored as:

$$p(\Delta N_1, \Delta N_2, \dots, \Delta N_J | T) = \prod_{n=1}^J p(\Delta N_n | \Delta \mathbf{N}^{(n-1)}; T), \quad (62)$$

449 where  $\Delta \mathbf{N}^n = [\Delta N_1, \Delta N_2, \dots, \Delta N_n]$ . This equation can be  
 450 simplified by noting that  $\Delta N_{i+1} = b_\xi(t_i; T) \Delta N_i$ , so  $\Delta N_i$  defines  
 451 a Markov process. Therefore:

$$p(\Delta N_1, \Delta N_2, \dots, \Delta N_J | T) = \prod_{n=1}^J p(\Delta N_n | \Delta N_{n-1}; T), \quad (63)$$

452 where  $p(\Delta N_1 | \Delta N_0; T) = p(\Delta N_1)$ .

453 In general,  $p(\Delta N_n | \Delta N_{n-1}; T)$  is not known. Bettencourt  
 454 points out that the maximum entropy density is the preferred  
 455 density when only the mean is known [10]. This turns out to be  
 456 the Poisson density:

$$p(\Delta N_n | \Delta N_{n-1}; T) = \lambda_{n-1}^{\Delta N_n} e^{-\lambda_{n-1}} / (\Delta N_n)!, \quad (64)$$

457 where  $\lambda_n = b_\xi(t_n; T) \Delta N_n$ . Taking the logarithm of Eq. (63), us-  
 458 ing Eq. (64), and eliminating terms independent of  $T$ ,  $-\log p(\Delta N_n | \Delta N_{n-1}; T)$   
 459 is proportional to:

$$\Phi(\Delta N_1, \Delta N_2, \dots, \Delta N_J | T) = \sum_{n=2}^J \lambda_{n-1}(T) - \sum_{n=2}^J \Delta N_n \log(\lambda_{n-1}(T)). \quad (65)$$

460 A maximum likelihood estimate of the transmissibility  $T$  or ba-  
 461 sic reproduction number  $R_0$  is equivalent to finding a  $T$  such  
 462 that  $\Phi(\Delta N_1, \Delta N_2, \dots, \Delta N_J | T)$  is minimized.

463 Although a Poisson density is used in deriving the con-  
 464 ditional likelihood function in Eq. (64), it has been observed  
 465 that the number of differential outbreak cases  $\Delta N(t_i)$  is over-  
 466 dispersive, i.e., the variances are larger than expected. It can be  
 467 shown that Consul's generalized Poisson distribution is a better  
 468 match to the data. This density has the form [14]:

$$p(n) = (1 - \omega) \lambda ((1 - \omega) \lambda + \omega n)^{n-1} \exp(-(1 - \omega) \lambda - \omega n) / n!, \quad (66)$$

469 where  $0 \leq \omega < 1$  is the dispersion parameter and  $\lambda$  is the mean.  
 470 Euler's difference formula can be used to show that  $p(n)$  is a  
 471 valid density ( $\sum_n p(n) = 1$ ).

472 *2.3.2. Estimating Instantaneous Transmissibility*

473 Define the instantaneous basic reproduction number  $R_0(t)$   
 474 as  $R_0(t) = Tu(t)G'_1(u(t))$ , which follows from Eq. (60), so that  
 475  $b_\xi(t; T) = \exp(\gamma\xi(R(t) - 1))$ . This equation has the advan-  
 476 tage of being network independent. Now, consider the vector  
 477 of estimates:  $\mathbf{R}^J = [R(t_1), R(t_2), \dots, R(t_J)]$  and the vector of  
 478 measurements  $\Delta\mathbf{N}^J$ , where  $\Delta\mathbf{N}^J = [\Delta N_1, \Delta N_2, \dots, \Delta N_J]$ . The  
 479 goal is to estimate the posterior density  $p(\mathbf{R}^J|\Delta\mathbf{N}^J)$ . Because  
 480 the likelihood function is a nonlinear function of  $R_0$ , a linear  
 481 Kalman filter cannot be used. In fact, an extended Kalman  
 482 filter is not robust enough to handle the rapid fluctuations in  
 483 the differential outbreak case histories. Therefore, a Bayesian  
 484 approach is used where the posterior probability density of the  
 485 state is constructed from the data. However, this density may  
 486 be difficult to evaluate using kernel or grid-based estimation pro-  
 487 cedures. Therefore, the density is approximated using sampling  
 488 procedures.

489 In order to illustrate the procedure, the following simple  
 490 problem is considered. Suppose one is required to evaluate the  
 491  $N^{th}$  moment of  $p(x|z)$ :

$$\langle x^N | z \rangle = \int x^N p(x|z) dx. \quad (67)$$

492 Assume a proposal density  $q(x|z)$  that is relatively easy to sam-  
 493 ple from. These samples are denoted by  $x^i \sim q(x|z)$  such that  
 494  $q(x|z) = \sum_{i=1}^M \delta(x - x^{(i)})/M$ , where  $\delta(x)$  is the Dirac delta func-  
 495 tion. Equation (67) can be rewritten as:

$$\langle x^N | z \rangle = \sum_{i=1}^N x^{(i)} \tilde{w}_i, \quad (68)$$

496 where  $\tilde{w}_i = w_i / \sum_i w_i$  and  $w_i = p(x^{(i)}|z)/q(x^{(i)}|z)$ . Therefore,  
 497 the  $N^{th}$  moment can be approximated by weighting samples  $x^{(i)}$   
 498 from a proposal density  $q(x|z)$  by a set of importance weights  
 499  $\tilde{w}_i$ .

The same procedure can be used to estimate the posterior  
 density. In this case  $w_i = p(\mathbf{R}^{J(i)}|\Delta\mathbf{N}^J)/q(\mathbf{R}^{J(i)}|\Delta\mathbf{N}^J)$  for a  
 suitably chosen proposal density  $q(\mathbf{R}^J|\Delta\mathbf{N}^J)$ . Now, using Bayes  
 theorem:

$$\begin{aligned} p(\mathbf{R}^J|\Delta\mathbf{N}^J) &= \frac{p(\Delta\mathbf{N}^J|\mathbf{R}^J)p(\mathbf{R}^J)}{p(\Delta\mathbf{N}^J)} \\ &= \frac{p(\Delta N_J|\Delta\mathbf{N}^{J-1}, \mathbf{R}^J)p(\Delta\mathbf{N}^{J-1}|\mathbf{R}^J)p(\mathbf{R}^J)}{p(\Delta\mathbf{N}^J)} \\ &= \frac{p(\Delta N_J|\Delta N_{J-1}, R_J)p(\mathbf{R}^J|\Delta\mathbf{N}^{J-1})}{p(\Delta N_J|\Delta\mathbf{N}^{J-1})}, \end{aligned} \quad (69)$$

500 where it is assumed that  $p(\Delta N_J | \Delta \mathbf{N}^{J-1}, \mathbf{R}^J) = p(\Delta N_J | \Delta N_{J-1}, R_J)$ .  
 501 In addition, assume that  $R_J$  is Markov so that  $p(\mathbf{R}^J | \Delta \mathbf{N}^{J-1}) =$   
 502  $p(R_J | R_{J-1})p(\mathbf{R}^{J-1} | \Delta \mathbf{N}^{J-1})$ . From Eq. (69):

$$p(\mathbf{R}^J | \Delta \mathbf{N}^J) = \frac{P(\Delta N_J | \Delta N_{J-1}, R_J)p(R_J | R_{J-1})p(\mathbf{R}^{J-1} | \Delta \mathbf{N}^{J-1})}{p(\Delta N_J | \Delta \mathbf{N}^{J-1})}. \quad (70)$$

503 The proposal density can be factored into the following form  
 504 using the product of conditional densities:

$$q(\mathbf{R}^J | \Delta \mathbf{N}^J) = q(R_J | \mathbf{R}^{J-1}, \Delta \mathbf{N}^J)q(\mathbf{R}^{J-1} | \Delta \mathbf{N}^J).$$

505 Suppose that  $q(R_J | \mathbf{R}^{J-1}, \Delta \mathbf{N}^J) = q(R_J | R_{J-1})$  and  $q(\mathbf{R}^{J-1} | \Delta \mathbf{N}^J) =$   
 506  $q(\mathbf{R}^{J-1} | \Delta \mathbf{N}^{J-1})$ . Using the definition of  $w_i$  above:

$$w_i = \frac{p(\Delta N_J | \Delta N_{J-1}, R_J^{(i)})p(R_J^{(i)} | R_{J-1}^{(i)})}{p(\Delta N_J | \Delta \mathbf{N}^{J-1})q(R_J^{(i)} | R_{J-1}^{(i)})}w_{i-1}. \quad (71)$$

507 For a simple particle filter examined here,  $q(R_J^{(i)} | R_{J-1}^{(i)}) =$   
 508  $p(R_J^{(i)} | R_{J-1}^{(i)})$ , so that:

$$p(R_J | \Delta N_J, \Delta N_{J-1}) = \sum_i \tilde{w}_i \delta(R_J - R_J^{(i)}), \quad (72)$$

509 where  $R_J^{(i)} \sim p(R_J | R_{J-1})$ ,  $w_i = p(\Delta N_J | \Delta N_{J-1}, R_J^{(i)})w_{i-1}$ , and  
 510  $\tilde{w}_i = w_i / \sum_i w_i$ . In order to prevent particle degeneracy (col-  
 511 lapse to a few particles), the nonuniform measure in Eq. (72)  
 512 is replaced by a uniform measure by computing the cumula-  
 513 tive distribution function (cdf) of  $\tilde{w}_i$  and uniformly sampling to  
 514 produce  $\tilde{R}_J^{(i)}$  such that  $p(R_J | \Delta N_J, \Delta N_{J-1}) = \sum_i \delta(R_J - \tilde{R}_J^{(i)})$   
 515 [15].

516 The state transition (sampling) density  $p(R_J | R_{J-1})$  can be  
 517 determined as follows. Augment the state  $R_J$  such that  $\mathbf{R}_J =$   
 518  $[R_J, \dot{R}_J]^T$  and assume a linear projection of the form:

$$\mathbf{R}_J = \mathbf{F}\mathbf{R}_{J-1} + \mathbf{w}_J, \quad (73)$$

519 where  $\dot{R} = dR/dt$  and:

$$\mathbf{F} = \begin{pmatrix} 1 & \xi \\ 0 & 1 \end{pmatrix} \quad (74)$$

520 and  $\mathbf{w}_J$  is a zero-mean Gaussian noise vector. Assume that  
 521  $\dot{R} = w(t)$ , where  $w(t)$  is a zero-mean white Gaussian noise pro-  
 522 cess and  $\ddot{R} = d^2w/dt^2$ . This constitutes a random ‘‘accelera-  
 523 tion’’ model. It can be shown that the corresponding covariance  
 524 matrix associated with the state  $\mathbf{R}_J$  in Eq. (73) is:

$$\text{Cov}(R, \dot{R}) = q \begin{pmatrix} \xi^3/3 & \xi^2/2 \\ \xi^2/2 & \xi \end{pmatrix}, \quad (75)$$

525 where  $q$  is a variance-like term. It then follows that  $p(R_J|R_{J-1})$   
526 is a zero-mean Gaussian density with covariance  $\text{Cov}(R, \hat{R})$ .  
527 The likelihood function is computed from Eq. (64).

### 528 3. Results and Discussion

#### 529 3.1. Steady-State Disease Spread

530 Some illustrative results using the steady-state disease spread  
531 model are described below for three types of contact networks:  
532 Poisson, Exponential, and Power-law. For these examples, the  
533 critical transmissibility is  $T_c = 0.049$ . This means that if the  
534 observed transmissibility  $T = T_c$ , then  $R_0 = 1$ , i.e.,  $T_c$  is the  
535 critical value above which the pandemic is self-sustaining. For  
536 comparative purposes, each contact network has the same crit-  
537 ical threshold  $T_c$ .

538 Fig. 3 depicts the outbreak distribution size prior to a pan-  
539 demic when  $R_0 = 0.8$  with no NPIs. This is the predicted  
540 number of people infected by a small outbreak. Both the Pois-  
541 son and exponential (urban) contact networks have similar size  
542 distributions, where large outbreak sizes ( $> 20$ ) are unlikely.  
543 The power-law contact network is highly peaked for small out-  
544 break sizes as expected. Although diminishingly small for larger  
545 outbreak sizes, it is not zero because there are a minority of  
546 super-spreaders with large contact degree. Fig. 4 depicts the  
547 fraction of the population affected by a pandemic as a func-  
548 tion of the basic reproduction number  $R_0$  when  $R_0 > 1$  with  
549 no NPIs. Communities have diverse experiences based on their  
550 contact patterns. The Poisson contact network has the great-  
551 est fraction of the population affected by a pandemic because  
552 individuals in a group are equally likely to become infected and  
553 to infect others. For an exponential (urban) contact network,  
554 there is a 50% reduction in the number of infected individu-  
555 als compared to a well-mixed population (40% versus 80%) for  
556  $R_0 = 2$ . For a power-law network, only 5% of the population is  
557 affected by the pandemic for  $R_0 = 2$ . Therefore, outbreaks are  
558 consistently less likely to reach pandemic proportions.

559 There are outbreaks that can occur outside the main pan-  
560 demic cluster, although they are relatively small. This is not  
561 predicted from SIR or Susceptible, Exposed, Infected, or Re-  
562 covered (SEIR) models. Fig. 5 shows the average number of  
563 people infected by outbreaks outside the main pandemic clus-  
564 ter. This average outbreak size can be determined as a function  
565 of  $R_0$  for the three contact networks. For  $R_0 > 2$  all three  
566 contact networks have low average outbreak sizes (less than 2)

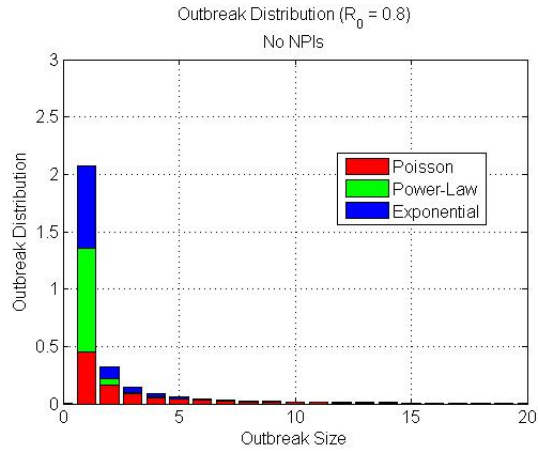

**Figure 3. Outbreak size distribution prior to a pandemic ( $R_0 = 0.8$ ) for three types of contact networks**

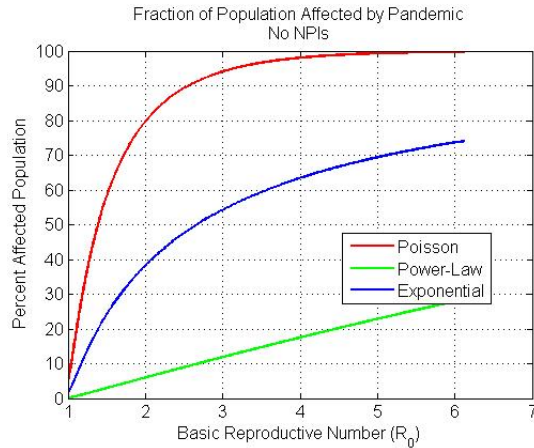

**Figure 4. Pandemic size (or fraction of individuals affected) as a function of  $R_0$  for three types of contact networks**

567 outside the main pandemic cluster. As expected, there are more  
 568 outbreaks near  $R_0 = 1$  because less of the population is affected  
 569 by the main pandemic and there is more opportunity for infec-  
 570 tions to spread outside the main pandemic cluster. Note that  
 571 the power-law network has a larger outbreak size for larger  $R_0$   
 572 because there are a minority of super-spreaders. Fig. 6 illus-  
 573 trates the individual risk of infection when  $R_0 = 2$  based on  
 574 the number of social contacts. The Poisson contact network  
 575 shows the most risk of individual infection. For ten contacts,  
 576 the risk of infection is approximately 55%. The exponential  
 577 (urban) network shows an individual infection risk of approxi-  
 578 mately 45% for ten contacts. The power-law contact network  
 579 shows the smallest individual risk of infection, roughly 20% for  
 580 ten contacts.

581 For uniform social distancing, it is assumed that the prob-

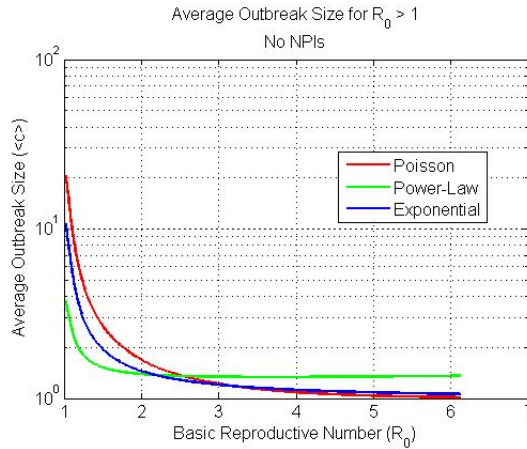

**Figure 5. Average outbreak size removed from the main pandemic cluster for three types of contact networks**

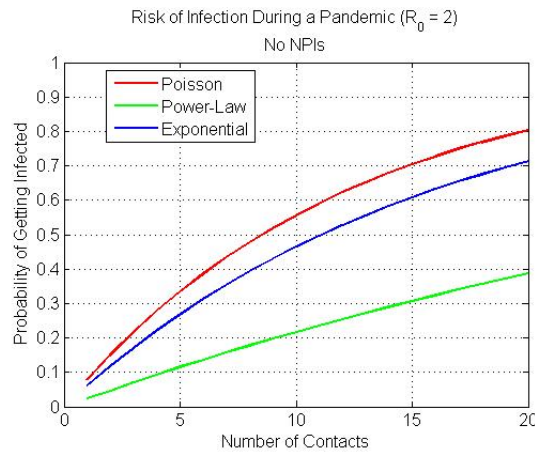

**Figure 6. Individual risk of an infection during a pandemic based on the number of contacts for three types of contact networks**

582 ability that a vertex of degree  $k$  is active is  $b_k = b$ , where  
 583  $0 \leq b \leq 1$ , so  $p'_k = b_k p_k$ . Basically, social distancing is applied  
 584 to every individual regardless of the number of contacts  
 585 an individual may have. Fig. 7 depicts the fraction of the population  
 586 affected by a pandemic as a function of  $R_0$  for different  
 587 degrees of uniform social distancing for three types of networks.  
 588 Uniform social distancing has the effect of shifting the onset of a  
 589 pandemic to larger effective  $R_0$  values. This is because the effective  
 590 critical transmissibility threshold  $T_{ceff}$  is now greater than  
 591 the baseline critical threshold  $T_c$  before intervention is imposed.  
 592 Asymptotic results for the Poisson network are consistent with  
 593 SIR/SEIR compartmental model results. In each case, the fraction  
 594 of the affected population is reduced exactly by the amount  
 595 of imposed social distancing. The exponential network shows

596 similar trends although its asymptotic values are smaller than  
 597 the Poisson network because the population is not well-mixed.  
 598 The power-law network shows little variation in its pandemic  
 599 onset or its peak (at  $R_0 = 6$ ) for a 20% increase in social dis-  
 600 tancing from the baseline. Even at 40% social distancing, the  
 601 percent affected population is only somewhat reduced, although  
 602 its pandemic onset is shifted to a larger  $R_0$  value. As explained  
 603 previously, this is due to a minority of super-spreaders that add  
 a degree of robustness to the network

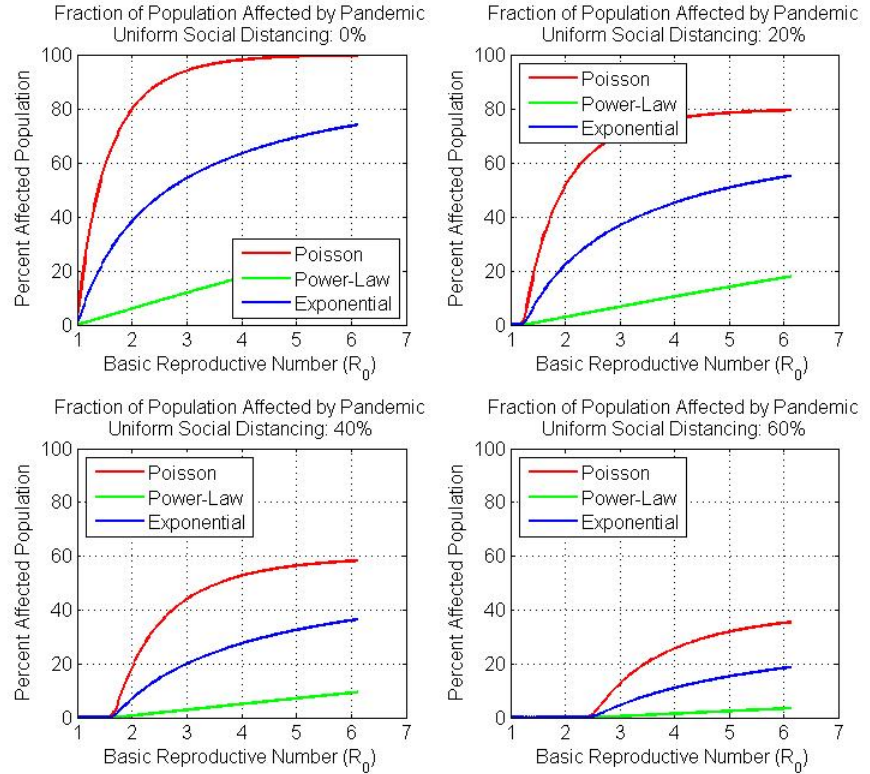

**Figure 7. Pandemic size as a function of  $R_0$  for three types of contact networks assuming uniform social distancing**

604 For directed social distancing, it is assumed that  $b_k = 1$  for  
 605  $0 \leq k \leq K_{\max}$  and  $b_k = 0$ , otherwise. Basically, all individu-  
 606 als with contact degree greater than  $K_{\max}$  are distanced. Note  
 607 that  $K_{\max}$  is related to the fractional number  $f_c$  of nodes re-  
 608 moved, or  $f_c = 1 - \sum_{k=0}^{K_{\max}} p_k$ . Fig. 8 illustrates the fraction of  
 609 the population affected by a pandemic as a function of  $R_0$  for  
 610 different degrees of directed social distancing for three types of  
 611 networks. Directed social distancing has a large effect on the  
 612 onset of a pandemic for both the exponential and power-law  
 613 contact networks. For a 10% reduction in social distancing for  
 614

615 high social contact individuals, the affected population is re-  
 616 duced from 75% to 50% for an exponential network and 30%  
 617 to zero for a power-law network when  $R_0 = 6$ . The affected  
 618 population for a Poisson network is reduced by only 10%. Al-  
 619 though not depicted in this figure, it can be shown that for  
 620 a 1.5% reduction in directed social distancing, there is a 25%  
 621 reduction in the affected population for a power-law network  
 622 when  $R_0 = 6$ . For a 2% reduction in directed social distancing,  
 623 none of the population is affected for  $R_0 \leq 6$ . However, the ex-  
 624 ponential network shows only a 5% reduction and the Poisson  
 625 network shows only a 2% reduction in the affected population,  
 626 respectively. The power-law network is the least robust to the  
 627 removal of high contact nodes. This is an important result that  
 could impact the way contact tracing is performed.

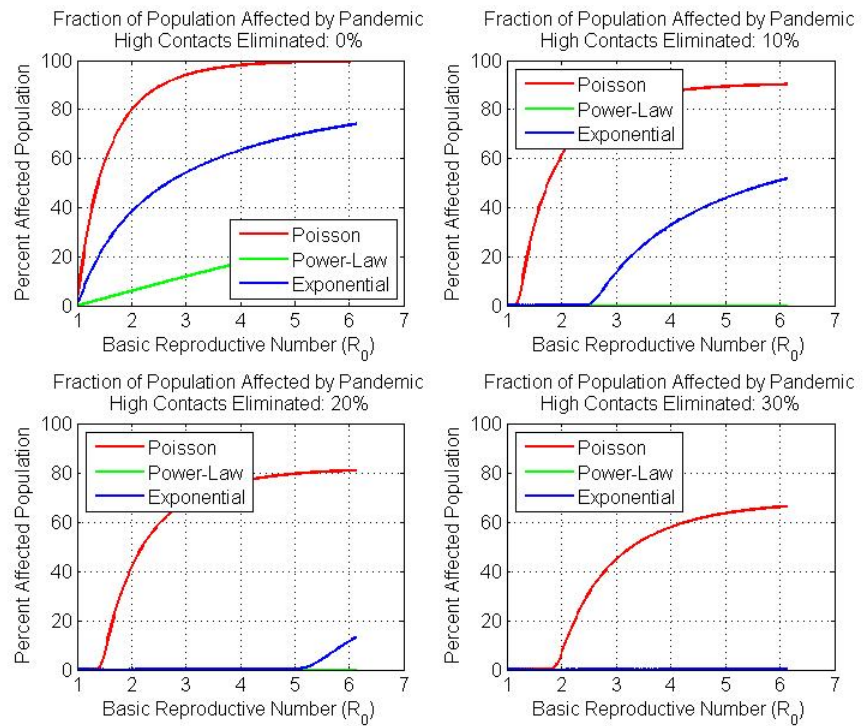

**Figure 8. Pandemic size as a function of  $R_0$  for three types of contact networks assuming directed social distancing**

628

### 629 3.2. Time-Dependent Disease Spread in Social Networks

630 Some illustrative results using the time-dependent disease  
 631 spread model are described below. Here, it is assumed that the  
 632 critical transmissibility is  $T_c = 0.049$ , the observed transmissi-  
 633 bility is  $T = 0.098$  (implying  $R_0 = 2$  initially), the infectious



634 period  $T_r$  is 7 days, the inception and release of (uniform) social  
 635 distancing starts at week 6 and ends at week 14, respectively,  
 636 and testing and contact tracing begins at week 16. Additionally,  
 637 80% of individuals are social distanced, the percent isolated per  
 638 week is 20%, and the percent traced per week is 30% per week.

639 Figures 9 and 10 depict the susceptible, infectious, and out-  
 640 break case load probabilities for a Poisson and exponential net-  
 641 work, respectively, for the example parameters outlined above.  
 642 The pandemic begins to build after week 2 and is arrested start-  
 643 ing at week 6 as a result of social distancing. Social distancing is  
 644 relaxed at week 14 with a consequent buildup in infections un-  
 645 til testing and contact tracing are initiated at week 16. There  
 646 is a large decline in the susceptible probability due to contact  
 647 tracing around week 20. Since testing and contract tracing is  
 648 assumed to continue over the model run (50 weeks), the out-  
 649 break case load reaches a steady state. Contrasting the differ-  
 650 ences between the Poisson and exponential networks, it is  
 651 apparent that the number of outbreak cases is smaller for the  
 652 exponential network and remediation strategies such as social  
 653 distancing, testing, and contact tracing are more effective for  
 654 the exponential network. Recall that this network does not as-  
 655 sume a well-mixed population where all individuals are equally  
 656 likely to become infected. The power-law network (not shown)  
 has an even smaller number of outbreak cases.

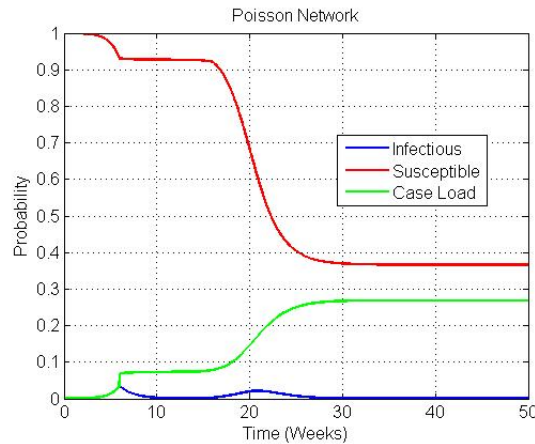

**Figure 9. Susceptible, infectious, and outbreak case load probabilities as a function of time for a Poisson network based on example parameters**

657

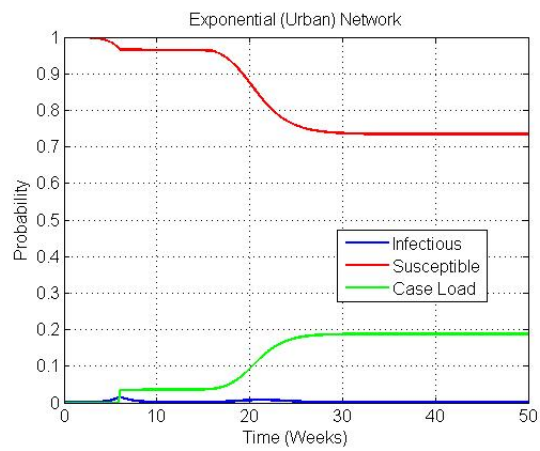

**Figure 10. Susceptible, infectious, and outbreak case load probabilities as a function of time for an exponential network based on example parameters**

658 Fig. 11 depicts the instantaneous basic reproduction number  
659  $R_0$  for three contact networks as a function of time for the NPI,  
660 testing, and contact tracing example outlined above. The incep-  
661 tion and lifting of social distancing protocols are clearly evident,  
662 where  $R_0$  is sizeably reduced over a period of 2 months. Note  
663 that for all three networks,  $0.3 \leq R_0 \leq 0.4$  over this interval of  
664 time. When the NPI is lifted at week 14, sheltered individuals  
665 are added back into the reservoir with a subsequent increase in  
666  $R_0$ . This pool slowly attrits from infections until week 16 when  
667 testing and contact tracing is initiated. A combination of test-  
668 ing and contact tracing lowers  $R_0$  to below unity near week 20,  
669 at which point, the disease ceases to spread. It is interesting to  
670 note that the power-law network has consistently lower  $R_0$  val-  
671 ues except during testing and contact tracing. This is because  
672 the rather low rates of testing and tracking miss a number of  
673 super-spreaders that are more prevalent in a power-law network.

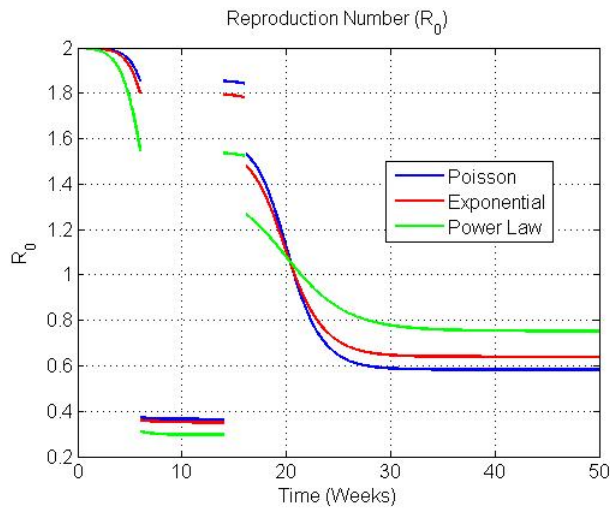

**Figure 11. Instantaneous basic reproduction number  $R_0$  as a function time for three contact networks based on example parameters**

674

### 675 3.3. Bayesian-based Estimation of Contact Transmissibility

676 Some illustrative results using the Bayesian-based estima-  
677 tion procedure for contact transmissibility are discussed below.  
678 Figures 12 and 13 illustrate particular examples of the approach  
679 for Massachusetts and New York given collected outbreak case  
680 histories from each state over a 2-3 month period starting in  
681 February 2020. It is assumed that the critical transmissibility  
682  $T_c = 0.049$  and the infection period  $T_r = 7$  days. The mod-  
683 els that best fit the data are used for each state – a Poisson

684 network for Massachusetts and an exponential network for New  
 685 York. The estimated transmissibility for Massachusetts is 0.089,  
 686 which translates into a  $R_0$  value of 1.8. Similarly, the estimated  
 687 transmissibility for New York is 0.185, which translates into a  
 688  $R_0$  value of 3.8. Both networks provide reasonable fits to their  
 689 respective observed differential outbreak case histories  $\Delta C(t)$   
 690 and reinforces the notion that the rapidity of disease spread in  
 New York was much more severe.

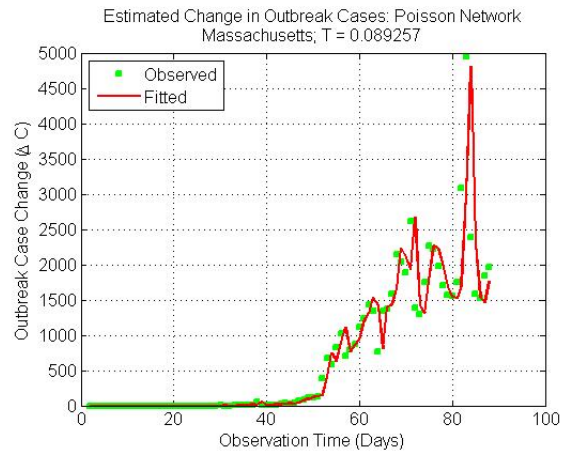

**Figure 12. Estimated and predicted change in outbreak cases  $\Delta C(t)$  for a Poisson network based on Massachusetts State outbreak data**

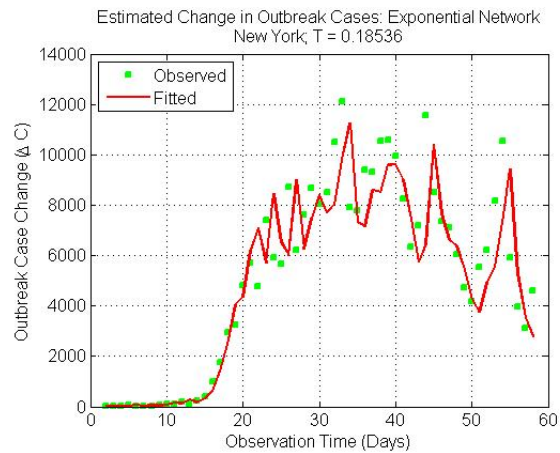

**Figure 13. Estimated and predicted change in outbreak cases  $\Delta C(t)$  for an exponential network based on New York State outbreak data**

691  
 692 The instantaneous basic reproduction number  $R_0(t)$  can also  
 693 be estimated by tracking the differential outbreak cases over  
 694 time using a particle filter. Figures 14 and 15 illustrate the  
 695 estimation technique for New York given the collected outbreak

696 history. The fit to the observed differential outbreak case data  
 697  $\Delta C(t)$  is quite good. In addition, the instantaneous  $R_0(t)$  values  
 698 are consistent with the average  $R_0$  value using an exponential  
 699 network model depicted in Fig. 13. However, Fig. 15 is more  
 700 illustrative because it allows one to examine the trend in  $R_0$   
 701 over the progression of the pandemic. In this case, there is  
 702 a downward trend after reaching a peak of approximately 3.5.  
 703 There is also an up tick in  $R_0$  at later times probability due to  
 704 an increase in testing. Note that estimation errors may result  
 in negative  $R(t)$  values that are not realistic.

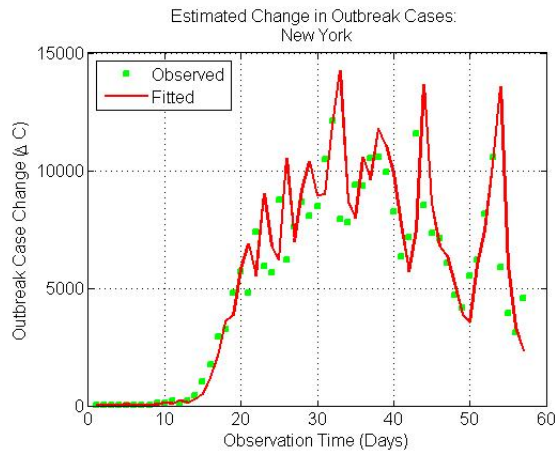

**Figure 14. Estimated and predicted change in outbreak cases  $\Delta C(t)$  based on New York State outbreak data using a particle filter**

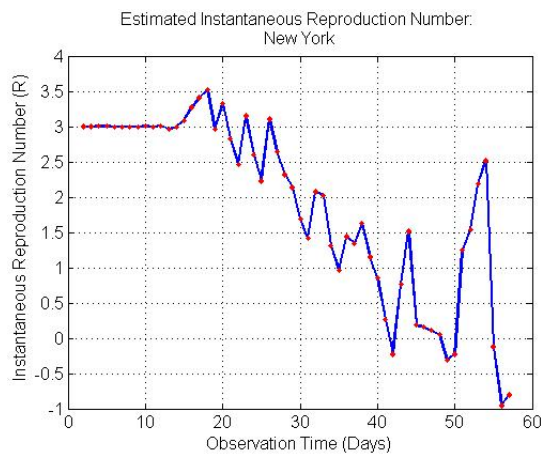

**Figure 15. Estimated instantaneous basic reproduction number  $R_0$  based on New York State outbreak data using a particle filter**

705

## 706 4. Conclusion

707 In the present work, we developed and illustrated a coarse-  
708 grain analytic modeling procedure that can be used to assess  
709 alternative strategies of implementing and subsequently lifting  
710 non-pharmaceutical interventions in response to the COVID-  
711 19 pandemic. This work was based on developing a multi-  
712 dimensional view of the problem by examining steady-state and  
713 dynamic disease spread using a network-based approach. The  
714 steady-state models, based on percolation theory, highlighted  
715 the previously known result that social contact structure is a  
716 key factor in the size of an outbreak. In addition, it was shown  
717 that the social contact structure influences the types of social  
718 distancing protocols that are deemed most effective. The dy-  
719 namic models, based on a stochastic reformulation of the SIR  
720 equations, further extended the work to include the effects of  
721 lifting non-pharmaceutical interventions and the importance of  
722 testing and contact tracing in reducing the overall infection rate.  
723 Providing a realistic assessment of the basic reproduction num-  
724 ber  $R_0$  is also important in gauging the severity of the outbreak  
725 within a specific geographic area. A Bayesian-based estima-  
726 tion procedure was developed to estimate both the average and  
727 instantaneous basic reproduction number from outbreak case  
728 histories at a state and county-wide level. These estimates can  
729 be used to seed other models or analysis procedures.

730 No single model is a panacea. Therefore, we advocate an  
731 ensemble modeling approach based on a combination of analytic  
732 and fine-grain agent-based models (ABMs). As outlined in a  
733 companion paper, this approach has the potential to provide  
734 valuable insights into disease spread and the effectiveness of non-  
735 pharmaceutical interventions. It could prove to be a valuable  
736 tool for decision-makers in conjunction with empirical analysis.

## 737 References

- 738 [1] R. Pastor-Satorras, A. Vespignani, Epidemic spreading in  
739 scale-free networks, *Physical review letters* 86 (14) (2001)  
740 3200.
- 741 [2] M. E. Newman, Spread of epidemic disease on networks,  
742 *Physical review E* 66 (1) (2002) 016128.
- 743 [3] M. E. Newman, The structure and function of complex  
744 networks, *SIAM review* 45 (2) (2003) 167–256.

- 745 [4] D. S. Callaway, M. E. Newman, S. H. Strogatz, D. J. Watts,  
746 Network robustness and fragility: Percolation on random  
747 graphs, *Physical review letters* 85 (25) (2000) 5468.
- 748 [5] M. Newman, *Networks: An Introduction*, Oxford, Eng-  
749 land, 2010.
- 750 [6] P. M. Chaikin, T. C. Lubensky, T. A. Witten, *Principles*  
751 *of condensed matter physics*, Vol. 10, Cambridge university  
752 press Cambridge, 1995.
- 753 [7] M. Barthélemy, A. Barrat, R. Pastor-Satorras, A. Vespig-  
754 nani, Dynamical patterns of epidemic outbreaks in com-  
755 plex heterogeneous networks, *Journal of theoretical biology*  
756 235 (2) (2005) 275–288.
- 757 [8] J. H. University, Coronavirus Resource Center, [https://](https://coronavirus.jhu.edu)  
758 [coronavirus.jhu.edu](https://coronavirus.jhu.edu) (2020).
- 759 [9] L. A. Meyers, B. Pourbohloul, M. E. Newman, D. M.  
760 Skowronski, R. C. Brunham, Network theory and sars: pre-  
761 dicting outbreak diversity, *Journal of theoretical biology*  
762 232 (1) (2005) 71–81.
- 763 [10] L. M. Bettencourt, R. M. Ribeiro, Real time bayesian es-  
764 timation of the epidemic potential of emerging infectious  
765 diseases, *PLoS One* 3 (5) (2008).
- 766 [11] G. Chowell, C. Castillo-Chavez, P. W. Fenimore, C. M.  
767 Kribs-Zaleta, L. Arriola, J. M. Hyman, Model parameters  
768 and outbreak control for sars, *Emerging Infectious Diseases*  
769 10 (7) (2004) 1258.
- 770 [12] S. L. Feld, Why your friends have more friends than you do,  
771 *American Journal of Sociology* 96 (6) (1991) 1464–1477.
- 772 [13] L.-S. Young, S. Ruschel, S. Yanchuk, T. Pereira, Conse-  
773 quences of delays and imperfect implementation of isolation  
774 in epidemic control, *Scientific reports* 9 (1) (2019) 1–9.
- 775 [14] P. Consul, F. Famoye, Generalized poisson regression  
776 model, *Communications in Statistics-Theory and Methods*  
777 21 (1) (1992) 89–109.
- 778 [15] N. Gordon, B. Ristic, S. Arulampalam, *Beyond the kalman*  
779 *filter: Particle filters for tracking applications*, Artech  
780 House, London 830 (5) (2004) 1–4.
